# Supplementary material
Source: PubMed Central journal article supplement (PMC8819916)
Supplement: NIHMS1771121-supplement-2.pdf [file NIHMS1771121-supplement-2.pdf]

**Supplement S1:** Difference between minimal slice registration and WB baseline registration (N=10) for the **a)** pelvis and **b)** lung regions from the 3 WBI institutions. All images are registered at 256x256 with 6mm slice thickness.
