# Supplementary material
Source: PubMed Central journal article supplement (PMC8819916)
Supplement: NIHMS1771121-supplement-4.pdf [file NIHMS1771121-supplement-4.pdf]

**Supplement S2:** Example DVHs of a 10 fraction TMI treatment for: **a)** Tspine and Sternum and **b)** lungs. Variations in the DVH can be seen at the 90-95% line for the bone structure and 10-30% for the lung.
