# Supplementary material
Source: PubMed Central journal article supplement (PMC8819916)
Supplement: NIHMS1771121-supplement-5.pdf [file NIHMS1771121-supplement-5.pdf]

Displacement of rigid shifts (mm)

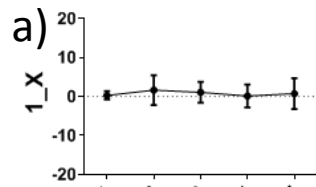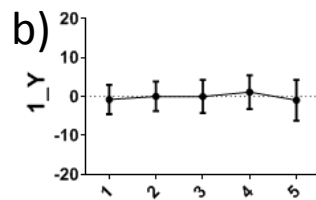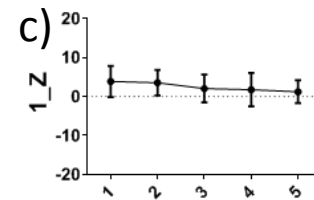

N = 6 Institution 1

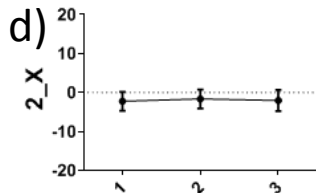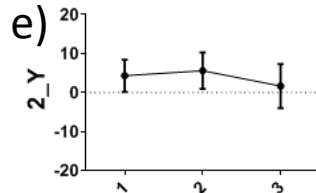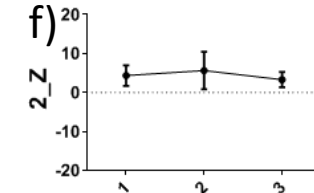

N = 11 Institution 2

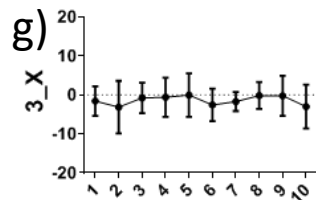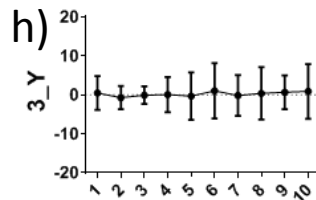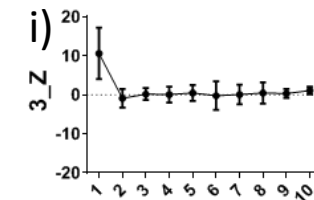

N = 20 Institution 3

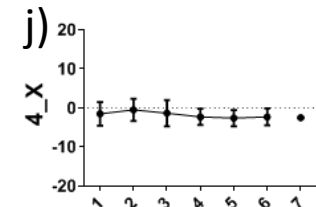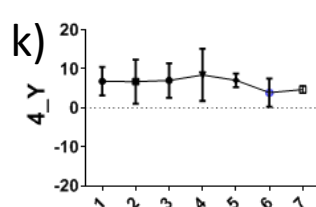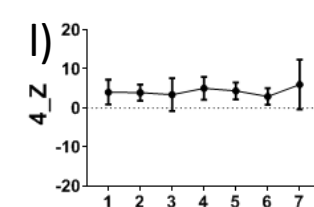

N = 11 Institution 4

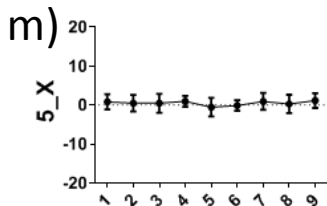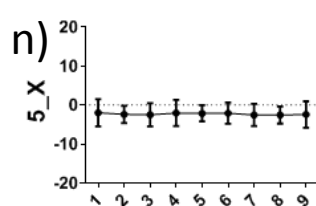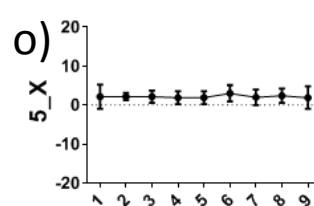

N = 10 Institution 5

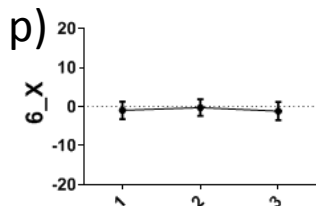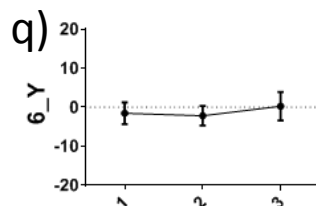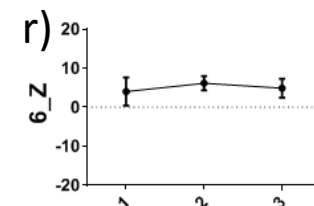

N = 10 Institution 6

Fraction Number
