# Supplementary material
Source: PubMed Central journal article supplement (PMC8819916)
Supplement: NIHMS1771121-supplement-6.pdf [file NIHMS1771121-supplement-6.pdf]

**Supplement S3:** Inter-fractional variation of pretreatment rigid shifts in x, y, and z for each institution for each fraction of treatment. Fractional motion was averaged together from every patient in the institution for every fraction in each cardinal direction.
