# Supplementary material
Source: PubMed Central journal article supplement (PMC8819916)

### Pelvis

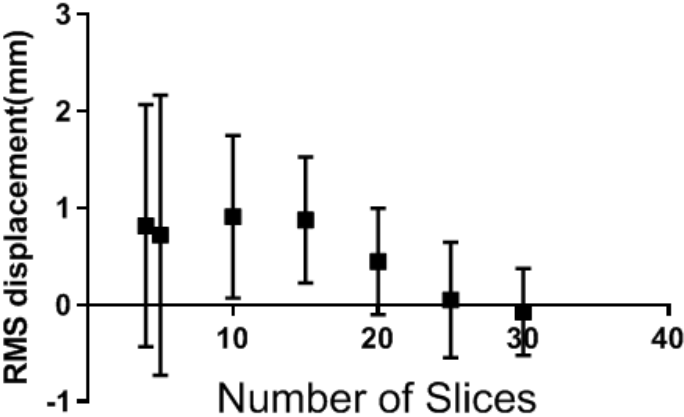

### Lung

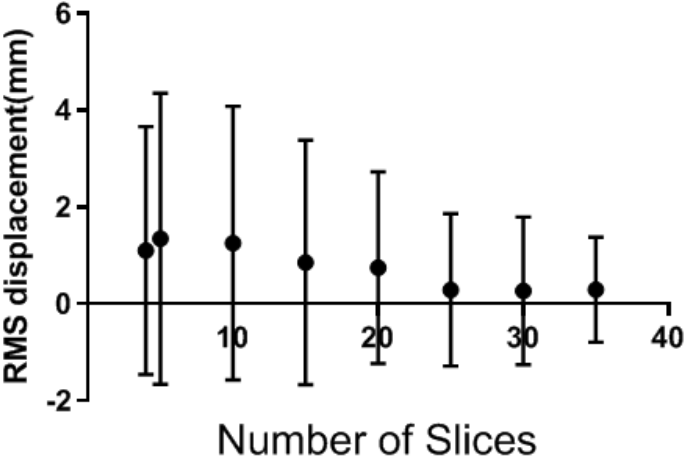

Supplement: NIHMS1771121-supplement-1.pdf [file NIHMS1771121-supplement-1.pdf]

T-spine and Sternum

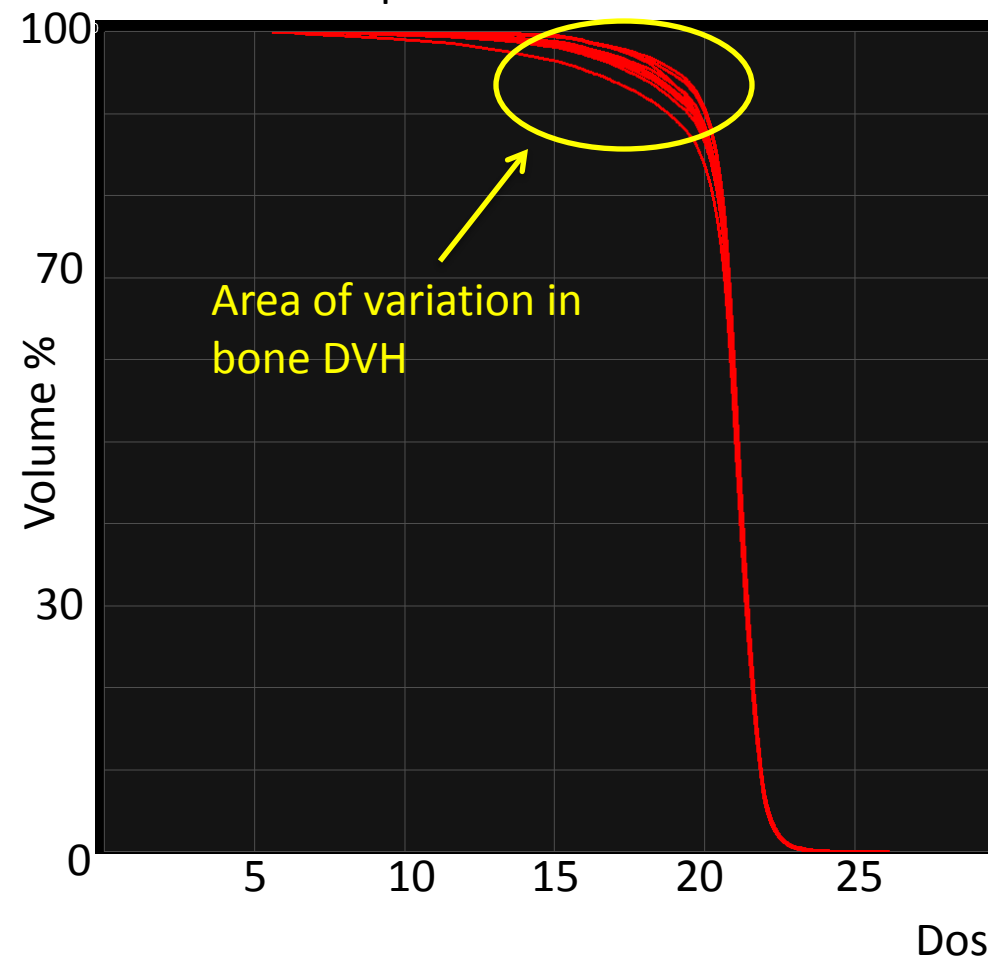

Lungs

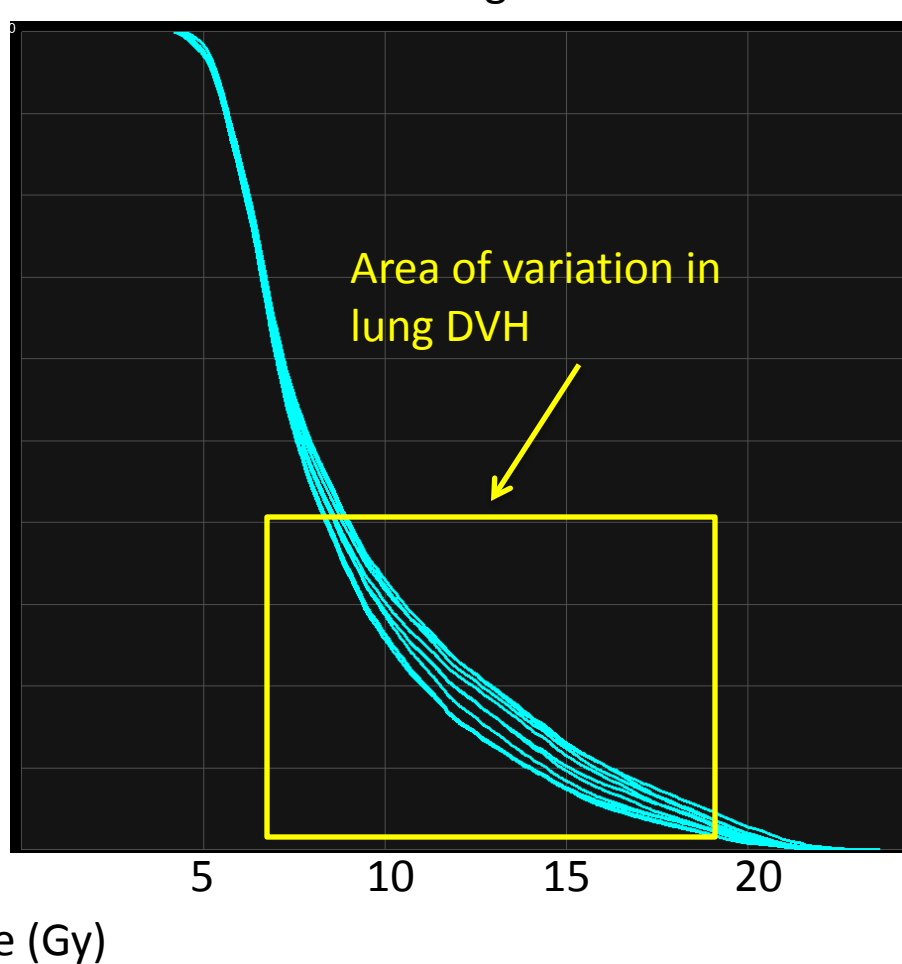

Supplement: NIHMS1771121-supplement-3.pdf [file NIHMS1771121-supplement-3.pdf]
